# Supplementary material
Source: PubMed Central journal article supplement (PMC2736363)
Supplement: NIHMS139392-supplement-01.pdf [file NIHMS139392-supplement-01.pdf]

## SUPPLEMENTAL MATERIAL

### Supplemental Tables:

**Table I: Sequence of the primers used for the quantitative real time RT-PCR.**

| Gene                                                                                     | Sequence                                     |
|------------------------------------------------------------------------------------------|----------------------------------------------|
| Mouse $\alpha_{1D}$ -adrenergic receptor F<br>Mouse $\alpha_{1D}$ -adrenergic receptor R | GCTGGTTCCCCTTTTCTTC<br>ATTGAAGTAGCCCAGCCAGA  |
| Mouse $\alpha_{1B}$ -adrenergic receptor F<br>Mouse $\alpha_{1B}$ -adrenergic receptor R | AACCTTGGGCATTGTAGTCG<br>AGGCAGCTGTTGAAGTAGCC |
| Mouse $\alpha_{1A}$ -adrenergic receptor R<br>Mouse $\alpha_{1A}$ -adrenergic receptor F | CTGCCATTCTTCCTCGTGAT<br>GGCTGGAGCATGGGTATATG |
| Mouse GAPDH F<br>Mouse GAPDH R                                                           | AACCTTGGCATTGTGGAAGG<br>GGATGCAGGGATGATGTTCT |

Supplemental Figures:

Figure I

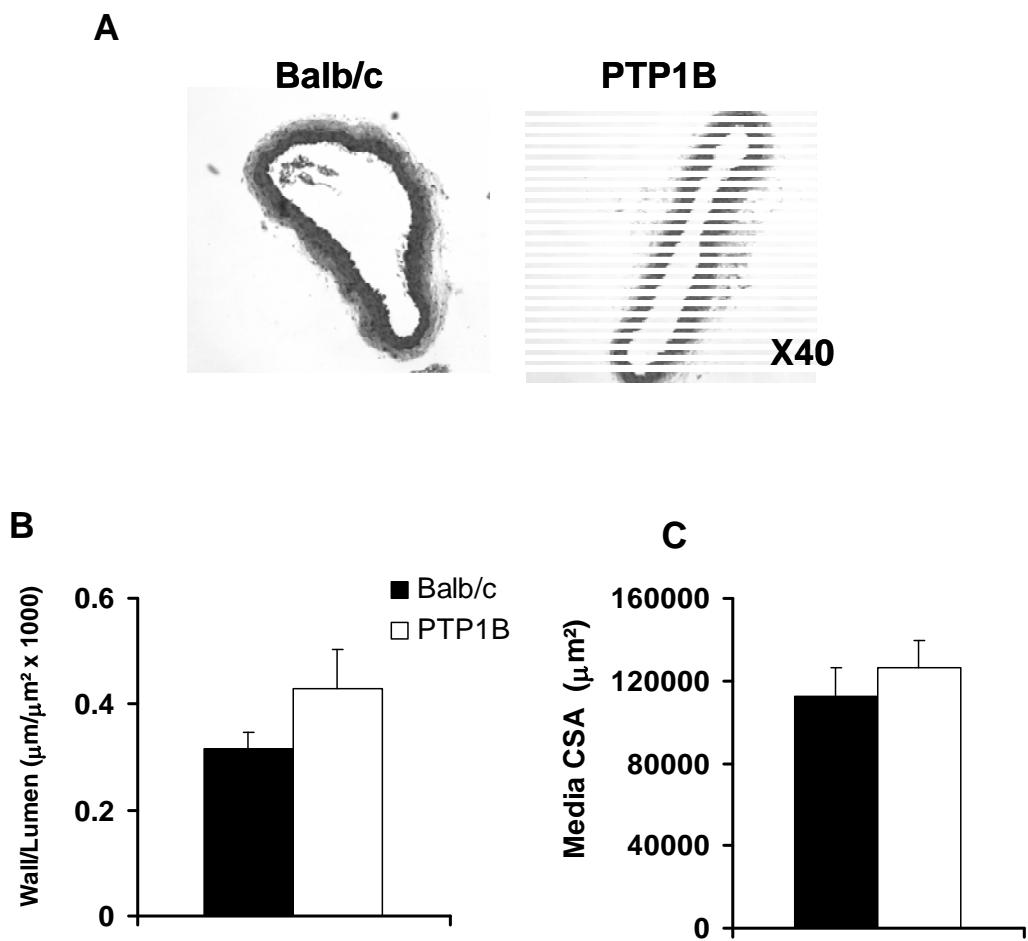

Figure II

A

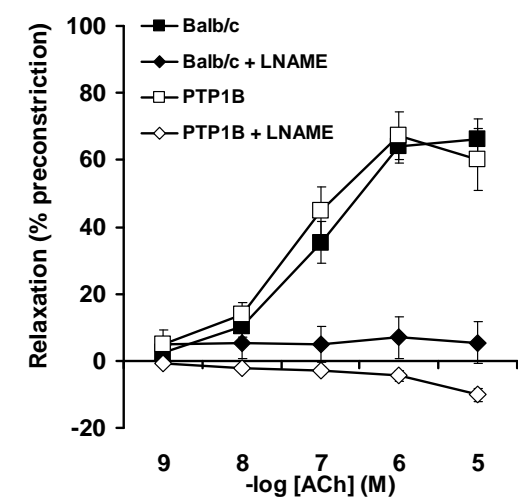

B

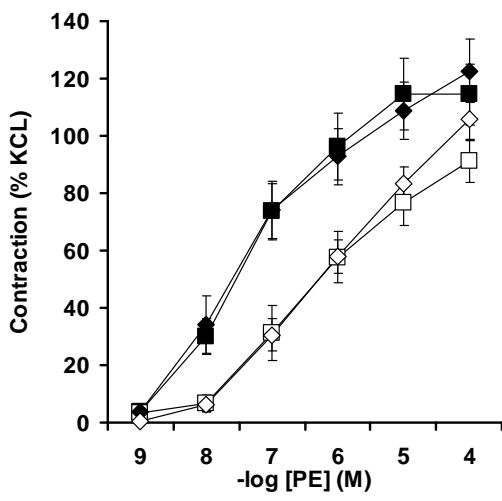

**Figure III**

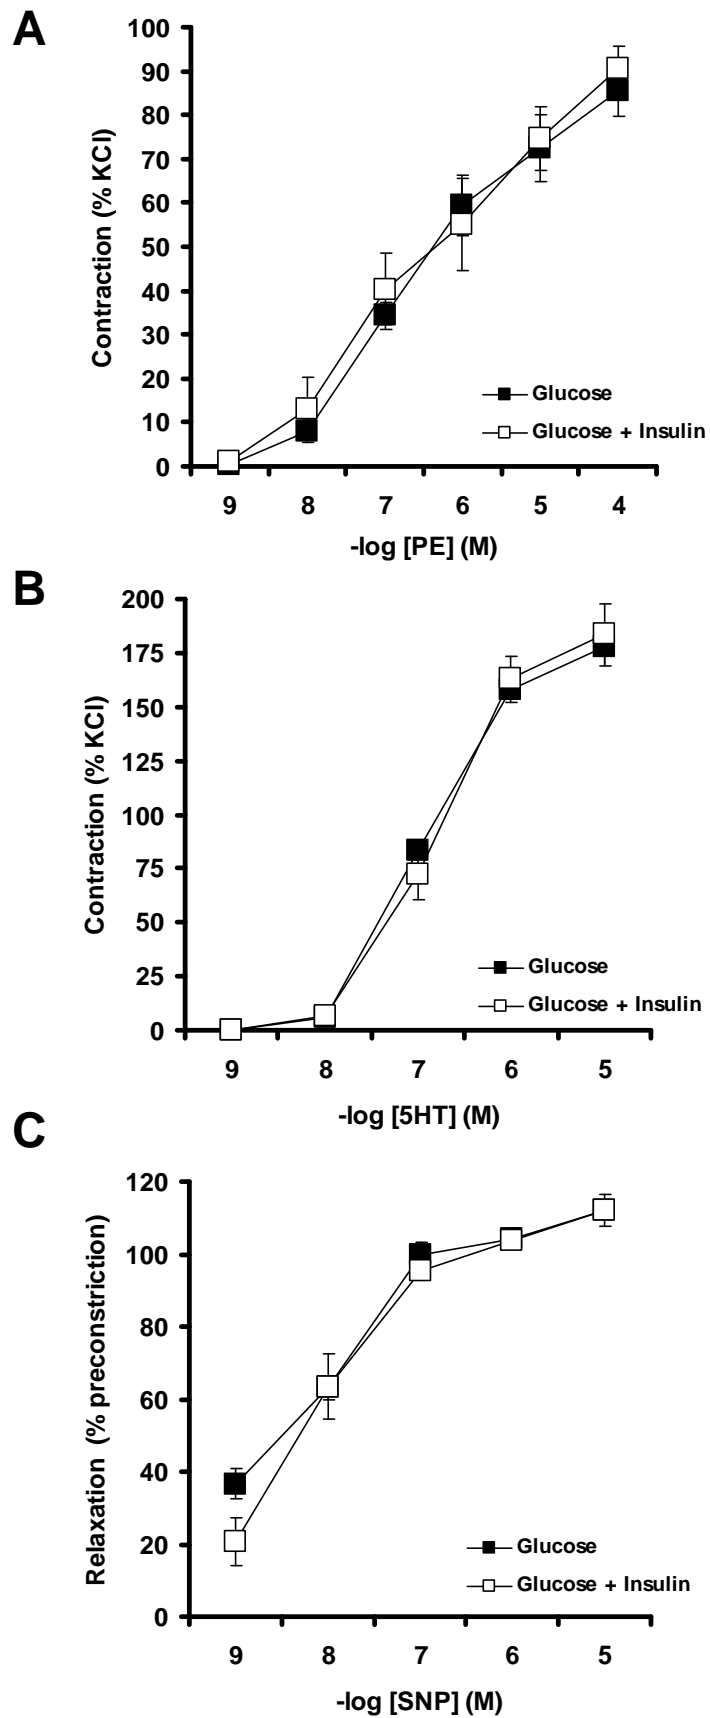

**Figure IV**

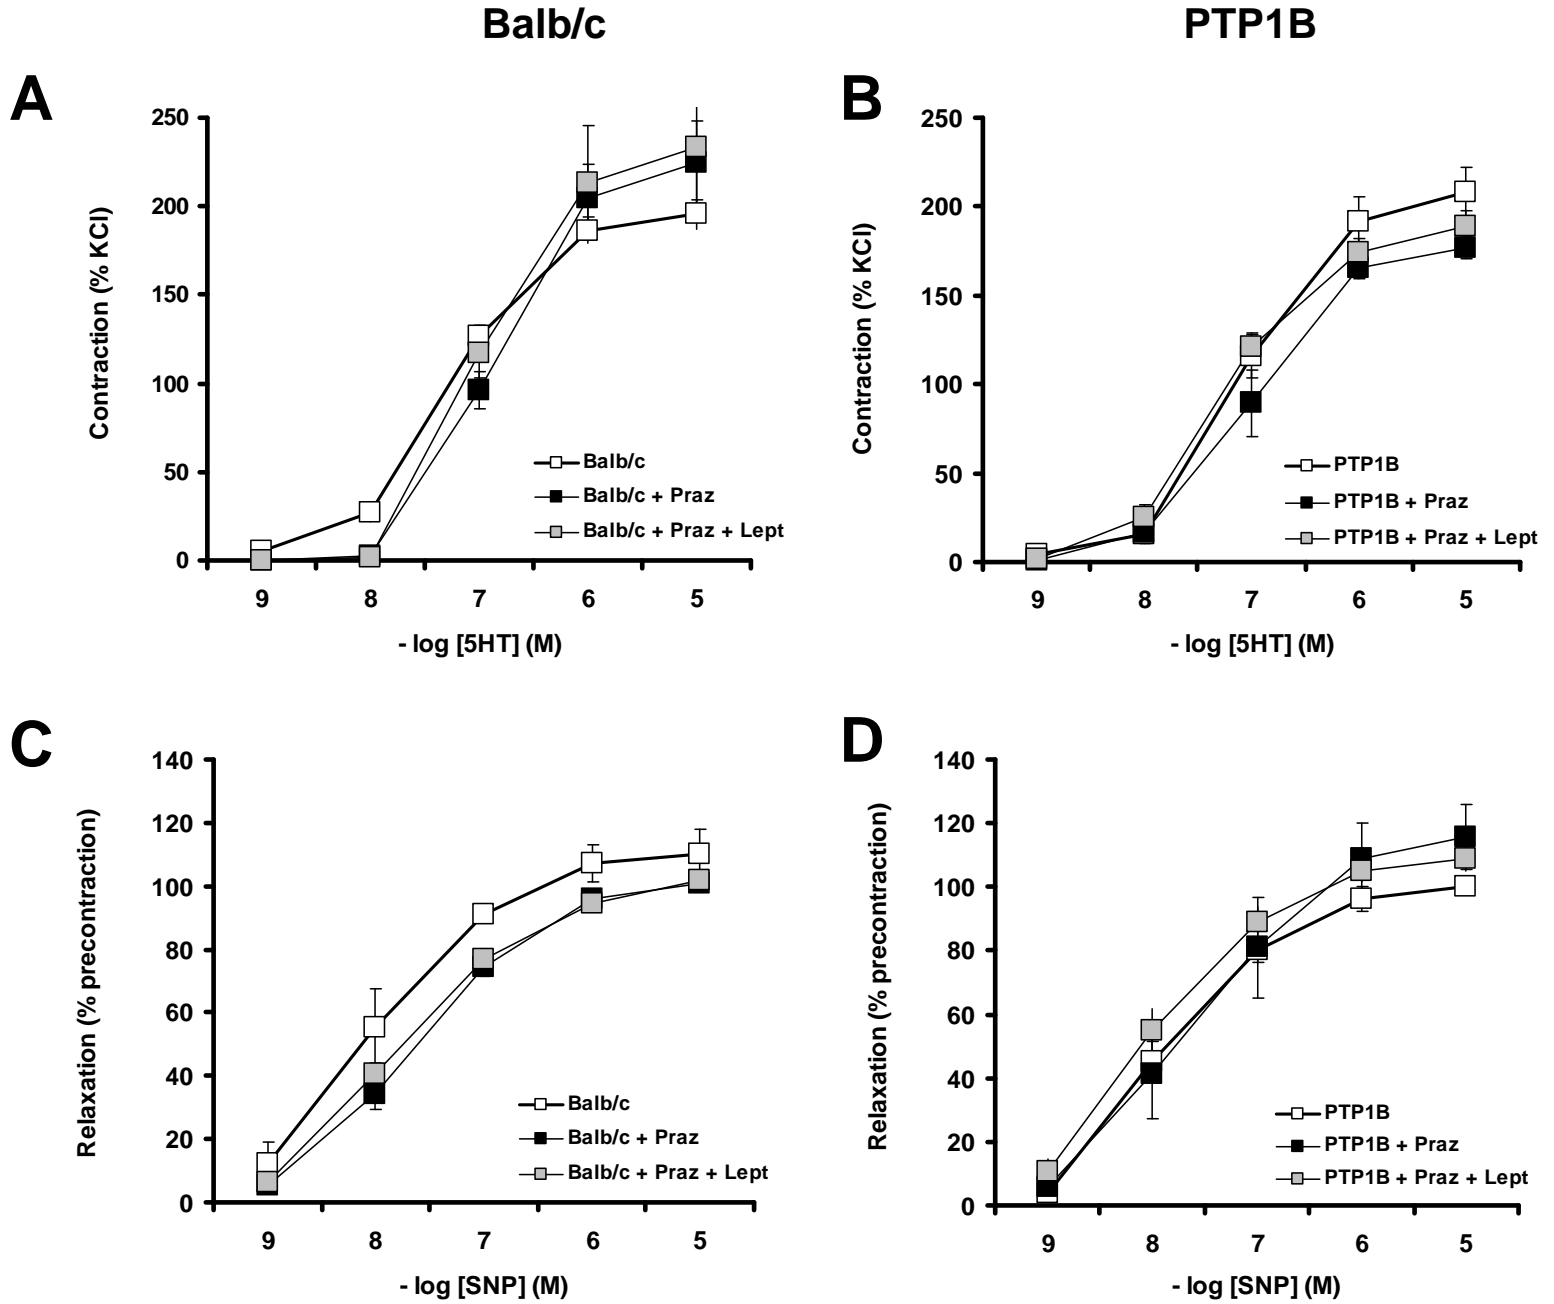

## **Supplemental Legends:**

**Figure I: PTP1B deletion did not affect vascular structure.** A) Representative pictures of aortic sections. B) Wall to lumen ration and C) quantification of the media cross sectional area in the Balb/c (n=5) and PTP1B KO mice (n=6). Data are presented as mean  $\pm$  sem.

**Figure II: PTP1B deletion did not impair endothelial function.** A) Cumulative concentration response curve to Acetylcholine (ACh) performed in the presence or absence of eNOS inhibitor (L-NAME, 10 mM). B) Cumulative concentration response curve to phenylephrine (PE) performed in the presence or absence of eNOS inhibitor (L-NAME, 10 mM). Data are presented as mean  $\pm$  sem. n= 8-10 per group.

**Figure III: Chronic insulin treatment in PTP1B KO mice did not affect the vascular reactivity.** Cumulative concentration response curve to (A) PE, (B) 5HT and (C) SNP, performed in PTP1B KO mice treated with glucose or with glucose + leptin. Data are presented as mean  $\pm$  sem.

**Figure IV: Chronic sympatho-inhibition did not affect vascular reactivity to serotonin and sodium Nitroprusside.** Cumulative concentration response curve to 5HT (A, in Balb/c and B, in PTP1B KO mice) and SNP (C, in Balb/c and D, in PTP1B KO mice), in mice treated with prazosin and prazosin + leptin. Data are presented as mean  $\pm$  sem.
